# Supplementary material for: Oxygen sensitivity of mitochondrial function in rat arterial chemoreceptor cells
Source: PubMed Central journal article supplement (PMC3731613; doi:10.1113/jphysiol.2013.257741), 2013-05-13
Supplement: tjp0591-3549-SD1.pdf [file tjp0591-3549-SD1.pdf]

### Supplementary Figure 1.

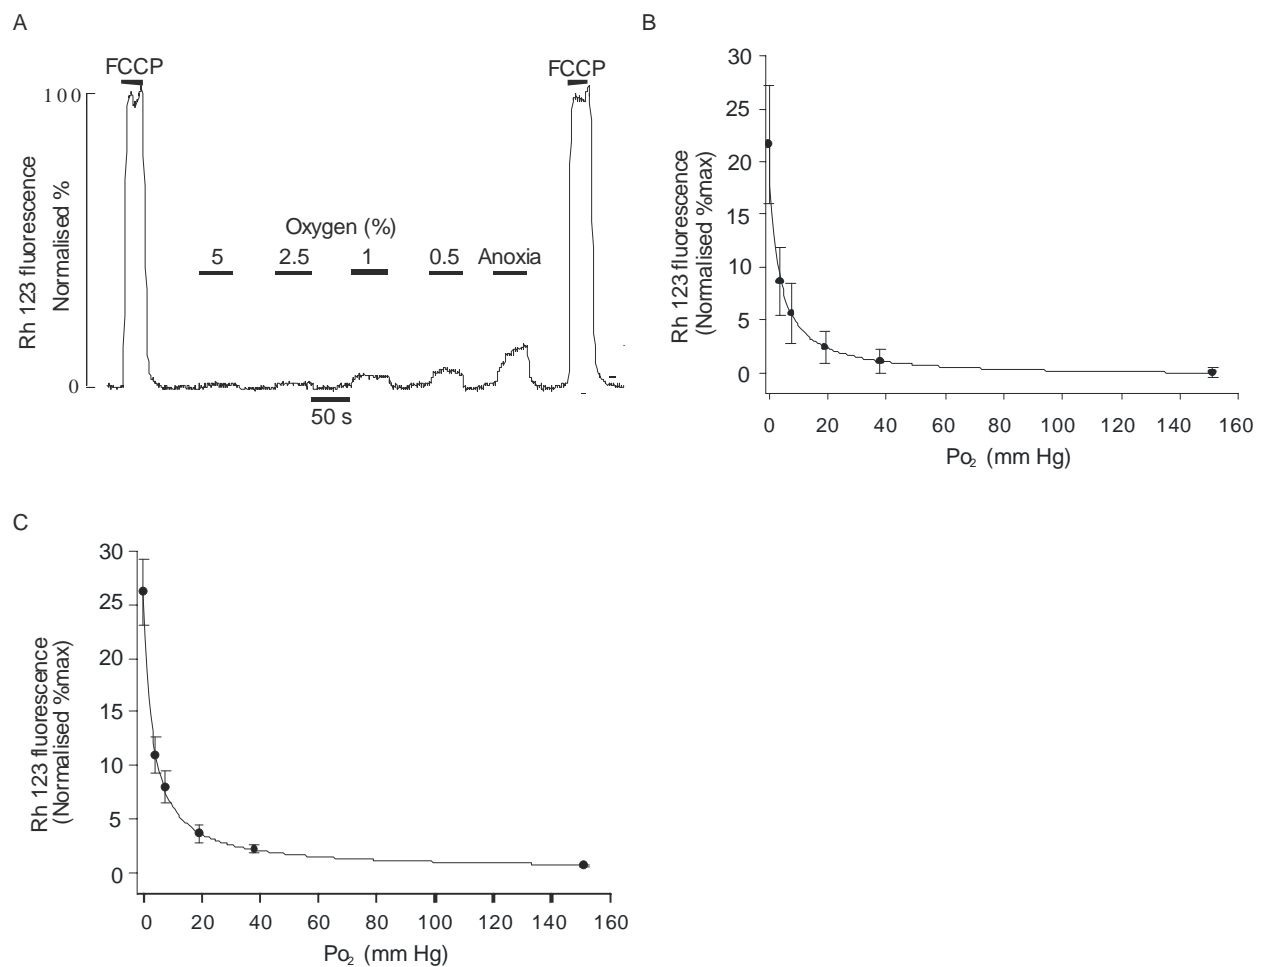

**Figure 1. Effects of hypoxia on mitochondrial membrane potential.**

Measurements of mitochondrial membrane potential were performed using rhodamine 123.

(A) Shows a recording of normalised rhodamine 123 fluorescence from a pair of type-1 cells conducted in  $Ca^{2+}$ -containing Tyrode plus 1 mM  $NiCl_2$ . (B) Shows normalised summary data for experiments conducted as in A with 1 mM  $NiCl_2$ . Effects of hypoxia were measured on a 0-100% scale where 0% = interpolated baseline fluorescence in 20%  $O_2$  and 100% = interpolated maximum fluorescence in 1  $\mu M$  FCCP. Data are mean ( $\pm$  SEM) from 11 recordings. Hypoxia and anoxia caused a significant increase in Rh123 fluorescence ( $P < 0.001$ ,  $n=11$  RM-ANOVA on ranks). Fitting a rectangular hyperbola to this data returned an  $R^2$  value of 0.86 and a  $P_{50}$  of 2.8 mmHg. (C) Shows normalised summary data for experiments conducted on single type-1 cells in the presence of normal extracellular calcium. Data are mean ( $\pm$  SEM) from 6 recordings. Fitting a rectangular hyperbola to this data returned an  $R^2$  value of 0.97 and a  $P_{50}$  of 2.9 mmHg.
